# Supplementary material for: Self-assemble nanoparticles based on polypeptides containing C-terminal luminescent Pt-cysteine complex
Source: PubMed Central journal article supplement (PMC5290470; doi:10.1038/srep41991), 2017-02-03
Supplement: srep41991-s1.pdf [file srep41991-s1.pdf]

## Supporting Information

### Self-assemble nanoparticles based on polypeptides containing C-terminal luminescent Pt-cysteine complex

E.G. Vlakh, E.V. Grachova, D.D. Zhukovsky, A.V. Hubina, J.R. Shakirova, A.S. Mikhailova,  
V.V. Sharoyko, S.P. Tunik\*, T.B. Tennikova\*

*St. Petersburg State University, Institute of Chemistry, Universitesky pr. 26, 198504*

*St. Petersburg, Russia*

\* Correspondence: [sergey.tunik@spbu.ru](mailto:sergey.tunik@spbu.ru); [tennikova@mail.ru](mailto:tennikova@mail.ru)

**Figure S1.**  $^1\text{H}$  NMR spectrum of **1** *trans* (acetone- $\text{d}_6$ , ambient temperature).

**Figure S2.**  $^1\text{H}$  NMR spectrum of **1** *cis* (acetone- $\text{d}_6$ , ambient temperature).

**Figure S3.**  $^1\text{H}$  NMR spectrum of **2** (methanol- $\text{d}_4$ , ambient temperature).

**Figure S4.** ESI $^+$  MS spectrum of **1**.

**Figure S5.** ESI $^+$  MS spectrum of **2**.

**Figure S6.** Thermogram of **2**-P(Bzl)Glu and Pt content calculation.

**Figure S7.** MTT assay of **2**-PGlu-*b*-PLEu particles.

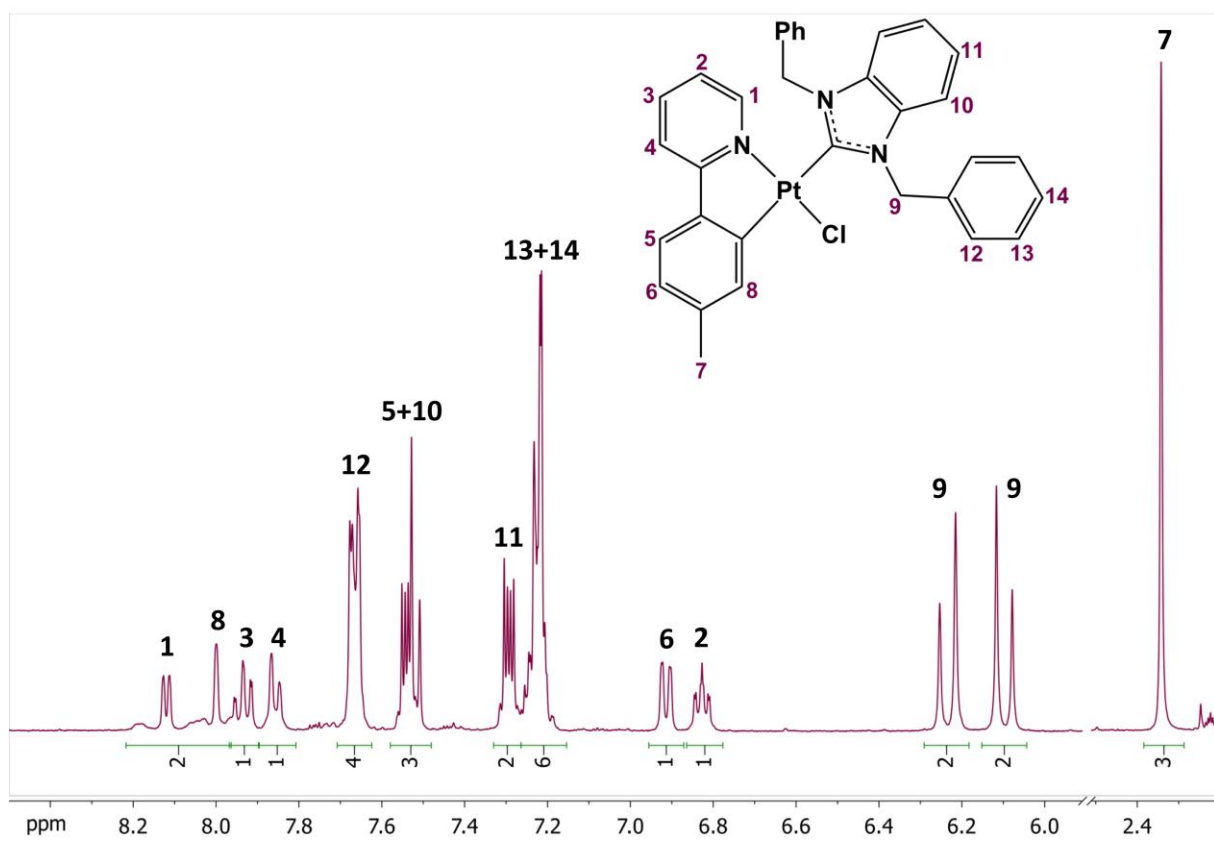

**Figure S1.**  $^1\text{H}$  NMR spectrum of **1 trans** (acetone- $\text{d}_6$ , ambient temperature).

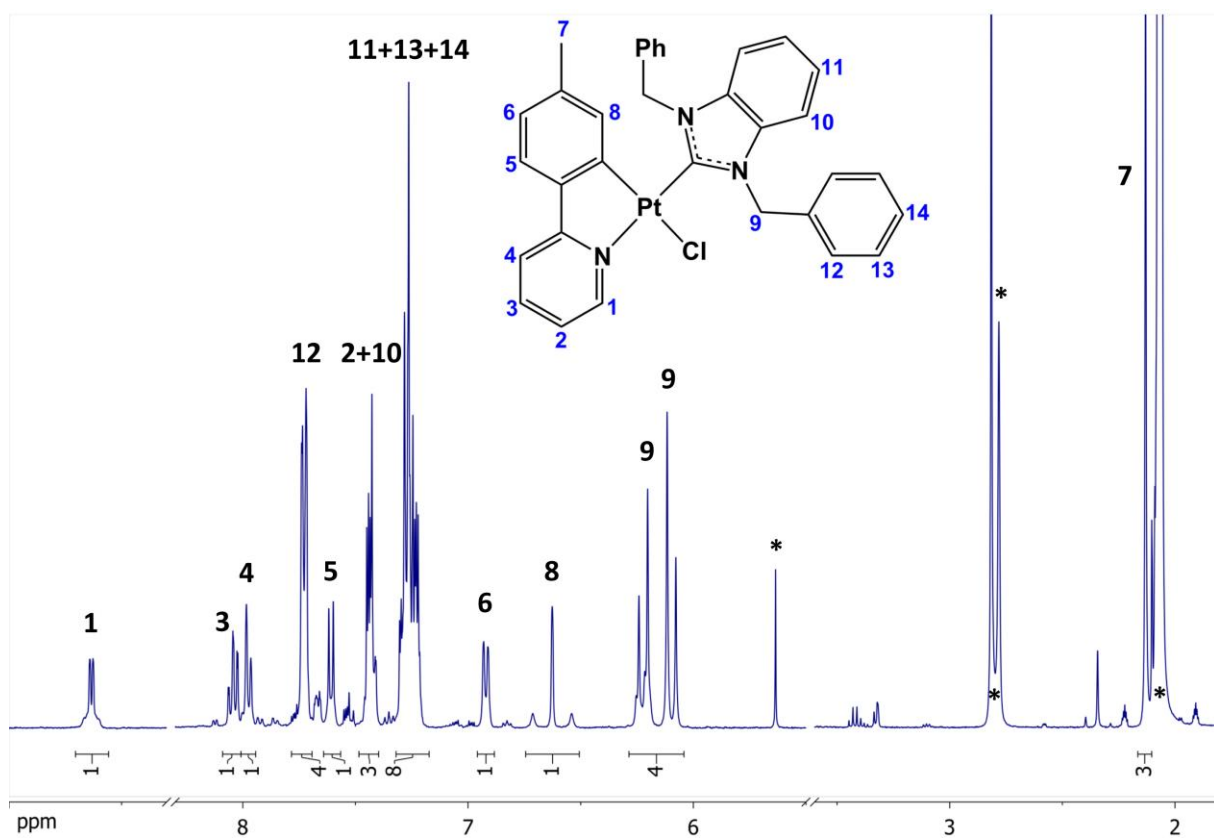

**Figure S2.** <sup>1</sup>H NMR spectrum of **1 cis** (acetone-d<sub>6</sub>, ambient temperature).

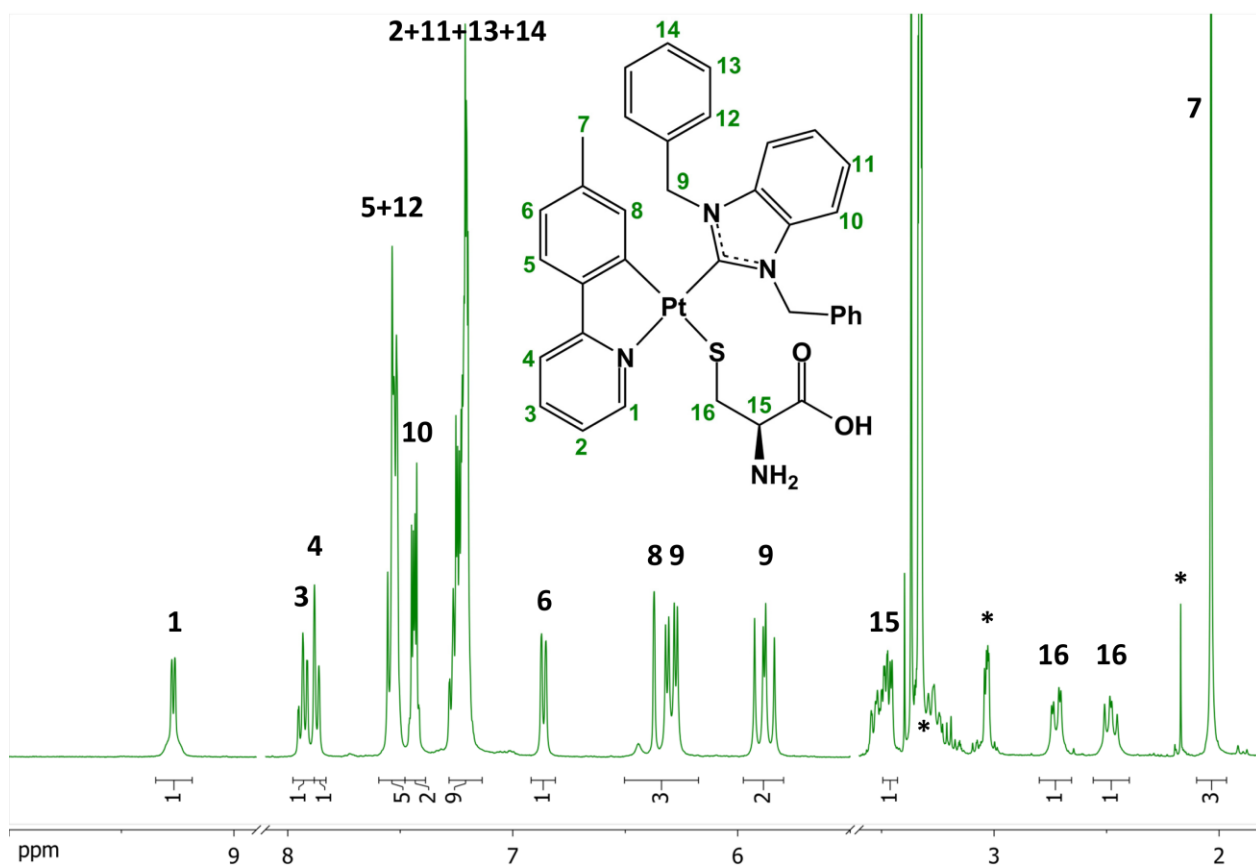

**Figure S3.**  $^1\text{H}$  NMR spectrum of **2** (methanol- $\text{d}_4$ , ambient temperature).

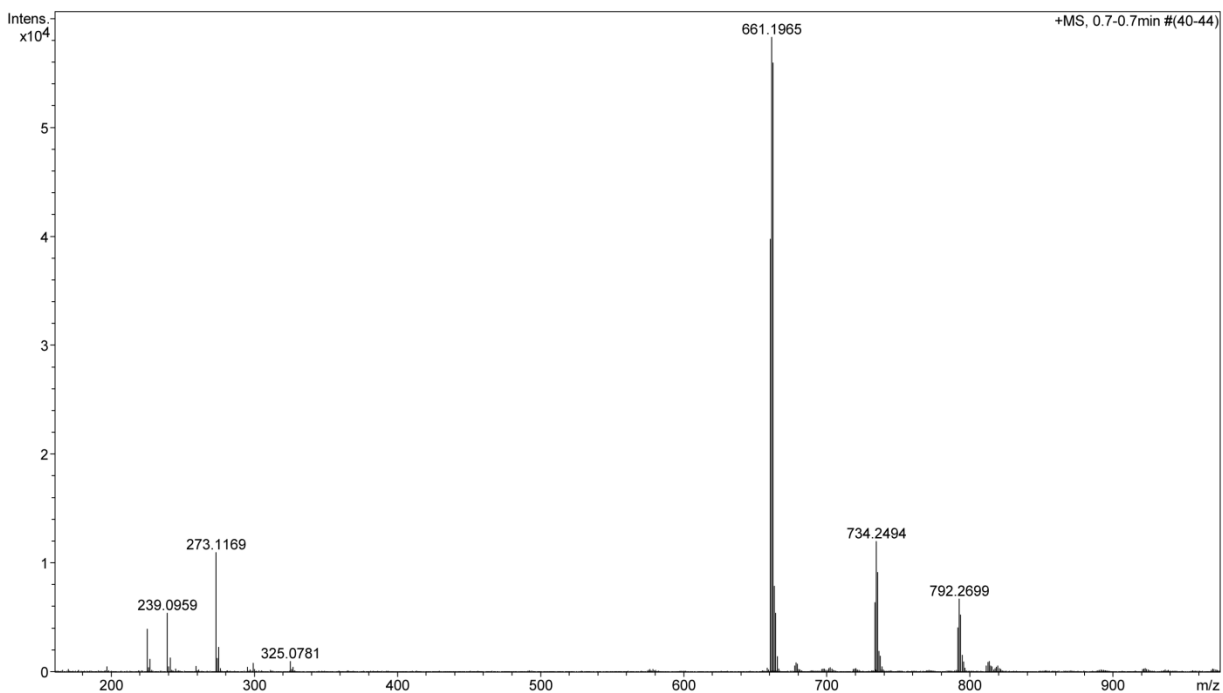

**Figure S4.** ESI<sup>+</sup> MS spectrum of **1**.

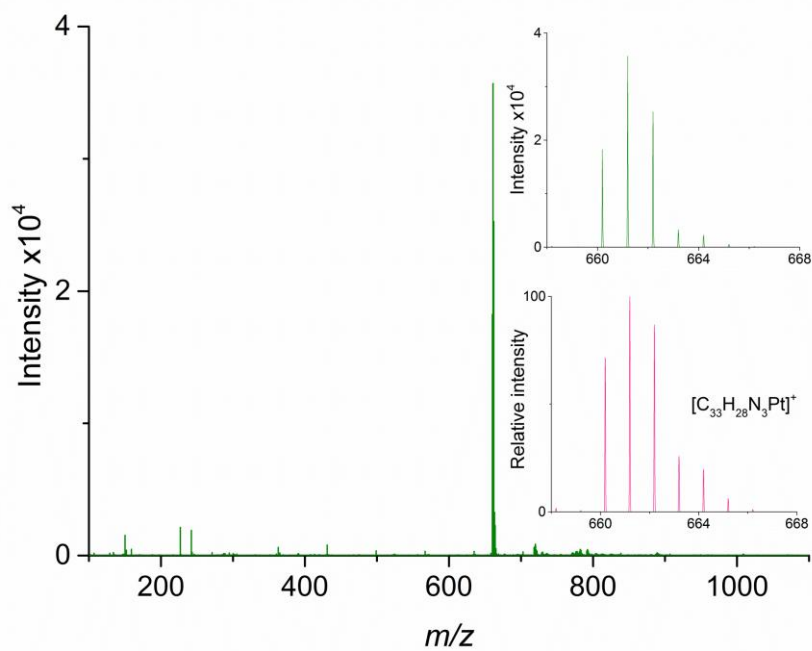

**Figure S5.** ESI<sup>+</sup> MS spectrum of **2** (green – experimental spectrum, pink – simulated signal with  $m/z$  661.19  $[M - Cys]^+$ ).

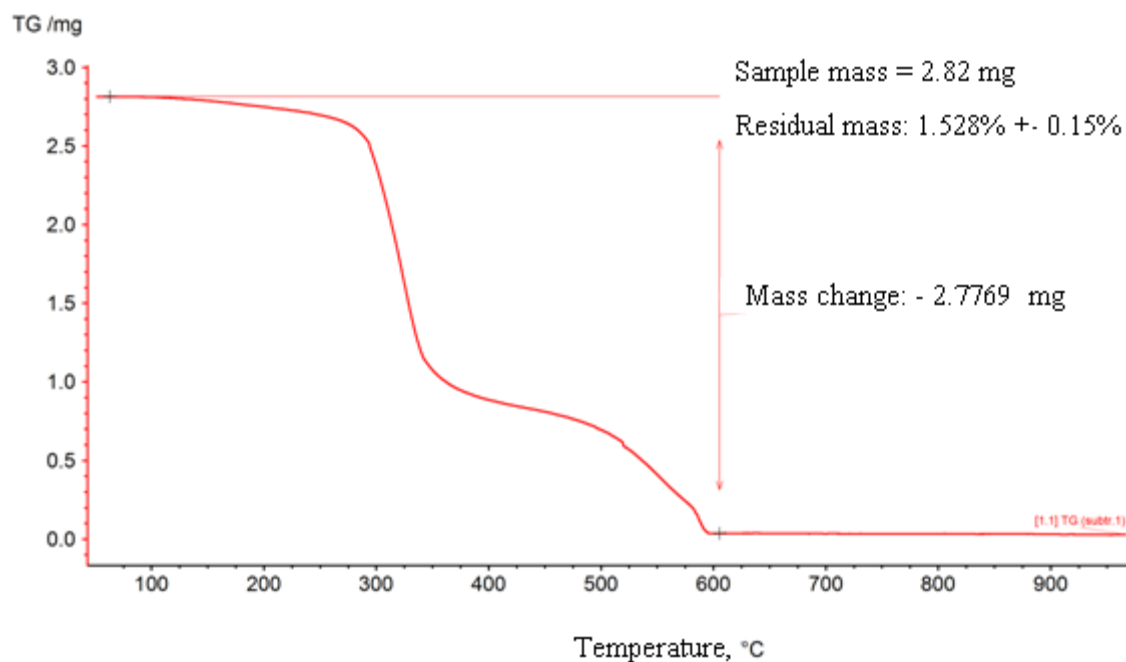

**Figure S6.** Thermogram of 2-P(Bzl)Glu and Pt content calculation *vide infra*.

The Pt content in the samples was calculated as follows:

$$m(\text{Pt})_{\text{theoretical}} = \frac{M(\text{Pt}) \times m(\text{polymer})}{M_n(\text{polymer})};$$

$$\eta = m(\text{Pt})_{\text{TGA}} / m(\text{Pt})_{\text{theoretical}} \times 100\%$$

Thus, for 2-P(Bzl)Glu:

$$m(\text{Pt})_{\text{TGA}} = 0.0431 \text{ mg}$$

$$m(\text{Pt})_{\text{theoretical}} = (195 \times 2.82) / 11500 = 0.04782 \text{ mg}$$

$$\eta = 0.0431 / 0.04782 \times 100\% = \mathbf{90.1\%}$$

According to TGA analysis, the mass change for 2-P(Z)Lys was equal to 0.47%, that corresponds to  $m(\text{Pt})_{\text{TGA}} = 0.02462 \text{ mg}$ . Taking into account that  $m(\text{Pt})_{\text{theoretical}}$  was 0.03199 mg,  $\eta$  was calculated to be **76.9%**.

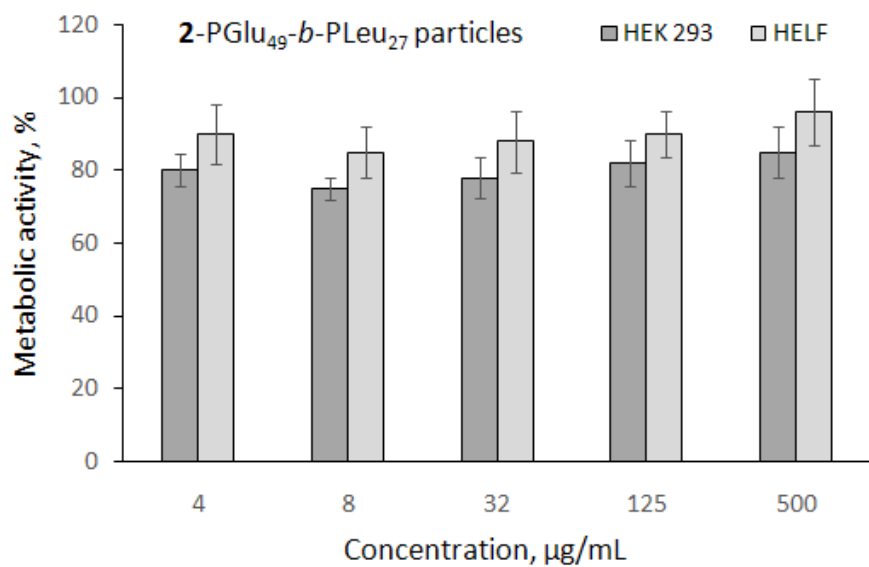

**Figure S7.** MTT assay of 2-PGlu-*b*-PLeu particles.

(A)

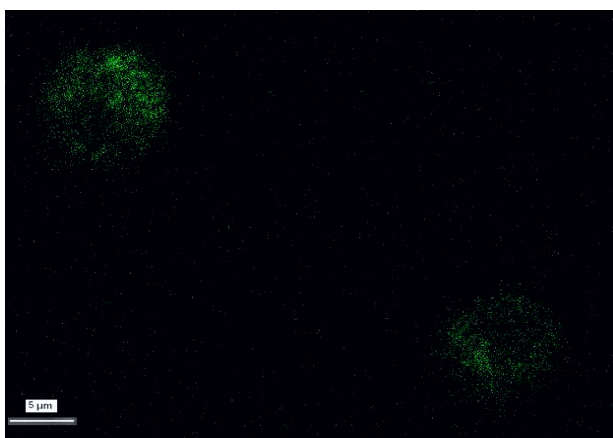

(B)

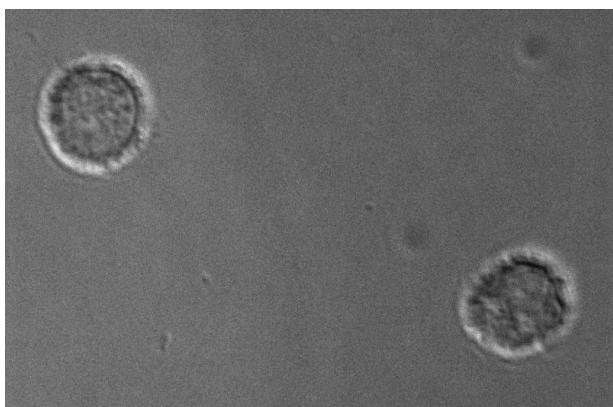

**Figure S8.** Broad area confocal images of U937 cells incubated with 2-PLyS<sub>119</sub>-*b*-PLeu<sub>141</sub> nanoparticles: (A) fluorescent (buffer, pH 7.4;  $\lambda_{\text{ex}}$  = 375-400 nm,  $\lambda_{\text{em}}$  = 500-530 nm) and bright-field (B).
